# Supplementary material for: Quantifying morphological variation in the Castilleja pilosa species complex (Orobanchaceae)
Source: PeerJ. 2019 Jun 20;7:e7090. doi: 10.7717/peerj.7090 (PMC6589334; doi:10.7717/peerj.7090)
Supplement: Supplemental Information 4 — Information pertaining to herbarium where specimen is housed, accession number of herbarium specimen (when available; some collections are currently in curation), collector and collection number of specimen, latitude and longitude of collection is included for each specimen. [file peerj-07-7090-s004.xlsx]

## Sheet: supplemental.table.S1
Herbarium	Accession Number	Collector/Collection number	Latitude	Longitude
ID	119927	Atwood 20851	39.5583	-116.361
WTU	278959	Bafus 222	44.7244	-117.841
WTU	21167	Bradley 156	44.1706	-118.7
WTU	380570	Brainerd 1402	42.9736	-118.159
WTU	74153	Brunsfeld 1525	44.5625	-114.851
ID	73416	Brunsfeld 1626	44.6382	-114.61
WTU	174223	Chisaki 895	39.6628	-120.411
ID	99127	Cholewa 7244	47.0829	-115.967
WTU	335479	Colwell JM213B	42.4942	-119.747
WTU	258484	Cronquist 11001	38.8783	-117.373
IDS	1999.1.252	Cronquist 1214	44.4021	-111.793
IDS	1999.1.249	Cronquist 1593	44.4021	-111.894
ID	30654	Cronquist 2556	43.867	-114.751
WTU	152443	Cronquist 7067	43.9599	-118.939
WTU	162435	Cronquist 7817	44.3798	-117.698
WTU	209154	Cronquist 8218	42.4385	-121.11
WTU	209159	Cronquist 8241	42.8267	-118.777
WTU	209165	Cronquist 8783	42.6832	-118.551
IDS	61166	Davis 148 32	44.0788	-111.496
IDS	1999.1.253	Davis 216	44.6211	-111.243
IDS	1999.1.250	Davis 556	43.8249	-114.096
WTU	335727	Denton ALD 01	42.4797	-119.629
WTU	268085	Denton 3886	39.6882	-120.649
WTU	268036	Denton 3920	39.3007	-120.413
WTU	348839	Egger 1225	45.1845	-117.116
WTU	348837	Egger 1232	45.2586	-117.176
WTU	384656	Egger 1495	44.3124	-118.717
WTU	318076	Egger 182	43.5574	-120.074
WTU	325991	Egger 606	38.6855	-120.009
WTU	331634	Egger 754	43.6934	-110.729
WTU	331633	Egger 755	44.93	-109.726
WTU	335531	Egger 959a	44.6769	-117.871
WTU	335540	Egger 969a	44.6992	-118.102
WTU	335539	Egger 969b	44.6992	-118.102
WTU	335500	Egger 980d	43.7825	-114.485
WTU	335508	Egger 984a	44.2547	-114.674
OSC	320832	Ertter 5728	43.3455	-119.567
ID	101339	Ertter 8808	44.8974	-116.096
WTU	103860	Ferris 11084	37.4256	-118.753
ID	120919	Fox 689	46.9923	-116.109
ID	54448	Gentry 2138	38.8965	-120.137
ID	in curation	Gilman 2015 036	39.0126	-114.319
ID	in curation	Gilman 2015 038	39.009	-114.321
WTU	337975	Goff 034	42.4986	-119.691
WTU	386085	Gross 717	41.6885	-118.878
WTU	286756	Halse 1831	43.5321	-119.433
WTU	56553	Hitchcock 5613	38.8207	-117.252
WTU	176670	Hitchcock s.n.	43.5437	-119.551
WTU	160066	Holmgren 10760	38.9435	-114.296
WTU	230347	Holmgren 1233	41.6515	-118.677
WTU	230595	Holmgren 1447	38.7802	-116.898
WTU	230630	Holmgren 1569	38.9881	-114.315
WTU	230633	Holmgren 1652	38.9118	-114.31
WTU	230640	Holmgren 2220	38.8871	-114.301
WTU	230343	Holmgren 2235	39.3501	-114.604
WTU	233952	Holmgren 2684	42.3078	-121.666
WTU	233890	Holmgren 2812	38.9877	-114.314
WTU	233947	Holmgren 2838	39.8716	-111.77
WTU	233889	Holmgren 2847	41.0218	-115.089
WTU	233957	Holmgren 2879	42.6324	-118.577
WTU	233874	Holmgren 2913	39.3137	-119.888
WTU	233866	Holmgren 2918	38.545	-119.813
WTU	233867	Holmgren 2924	37.9171	-119.209
WTU	233950	Holmgren 2926	37.8413	-118.859
WTU	233951	Holmgren 2936	37.4717	-118.713
ID	56238	Holmgren 3619	41.1094	-121.164
WTU	94776	Holmgren 3625	39.8283	-113.92
WTU	275648	Holmgren 4119	41.51	-119.071
WTU	256063	Holmgren 5347	44.4022	-111.893
WTU	285160	Holmgren 8861	44.0328	-118.04
WTU	305897	Holmgren 9484	40.7379	-120.317
WTU	160729	Holmgren 9618	43.5473	-119.513
ID	349961	Ionta 00 14	44.2667	-120.2
ID	in curation	Jacobs 2015 072	39.6879	-120.643
ID	in curation	Jacobs 2015 073	39.6564	-120.648
ID	in curation	Jacobs 2015 075	39.3447	-120.351
ID	in curation	Jacobs 2015 076	38.8526	-120.113
ID	in curation	Jacobs 2015 084	38.6802	-119.592
ID	in curation	Jacobs 2015 093	37.5643	-118.97
ID	in curation	Jacobs 2015 096	37.5519	-118.961
ID	in curation	Jacobs 2015 102	37.4191	-118.755
ID	in curation	Jacobs 2015 106	42.6662	-118.565
OSC	150400	Johnson 850289	44.8921	-116.108
WTU	143805	Jones 295	46.5483	-114.984
ID	128680	Kemper 143	47.0186	-115.998
WTU	367767	Knoke 472	42.5936	-120.877
WTU	365965	Knoke 577	42.4526	-120.626
WTU	368420	Knoke 611	42.4683	-120.505
WTU	189878	Kruckeburg 3544	37.985	-119.266
WTU	189100	Kruckeburg 4167	44.4111	-115.372
WTU	167429	Maguire 26075	37.6353	-118.254
WTU	228033	Maguire 21128	39.0048	-114.32
WTU	168646	Maguire 25800	38.7704	-116.932
WTU	111723	Maguire 26487	43.5758	-119.573
ID	58770	Mann 84	44.2477	-115.059
ID	43410	Mason 11980	38.0135	-119.724
WTU	104936	Moseley 591	46.9493	-115.282
WTU	315673	Olmstead 717	42.7881	-118.874
WTU	315928	Olmstead 752	42.4069	-119.708
WTU	335334	Olmstead RGO96 54	42.5	-119.817
WTU	177720	Ownbey 3412	44.9143	-109.643
WTU	283942	Packard 78 89	44.2934	-117.84
WTU	9558	Peck 18941	43.5453	-118.998
ID	51128	Peck 21406	42.8082	-118.901
WTU	155020	Pennell 22950	39.3365	-114.6
WTU	297774	Reveal 2428	42.7612	-118.725
WTU	297700	Reveal 2450	42.1268	-120.597
WTU	360722	Rodman 681	45.2625	-117.177
WTU	276444	Rogers 1006	41.8456	-119.555
IDS	1999.1.462	Tiehm 10589	40.9549	-119.567
ID	123943	Tiehm 13189	41.8071	-119.956
WTU	352396	Tiehm 13885	40.0293	-119.789
ID	85852	Tiehm 8790	41.5323	-119.549
IDS	1999.1.461	Tiehm 9598	41.5259	-119.306
WTU	133925	Train 4258	38.5623	-118.798
WTU	140726	Vollmer 229	37.6339	-118.256
IDS	2012.01	Whitehead 487	44.5233	-111.287
WTU	398549	Wilson s.n.	44.1335	-120.697
WTU	109153	Wolf 5217	38.6144	-119.925
WTU	370131	Zika 11219	42.7551	-118.745
