# Supplementary material for: Quantifying morphological variation in the Castilleja pilosa species complex (Orobanchaceae)
Source: PeerJ. 2019 Jun 20;7:e7090. doi: 10.7717/peerj.7090 (PMC6589334; doi:10.7717/peerj.7090)
Supplement: Supplemental Information 5 [file peerj-07-7090-s005.xlsx]

## Sheet: supplemental.table.S2
species (number of specimens measured)	C. nana (n=29)	C. pilosa (n=79)	C. pilosa var. longispica (n=23)	C. pilosa var. pilosa (n=52)	C. pilosa var. steenensis (n=4)
Habit
Plant height (cm)	10.87 (2.95)	21.37 (6.84)	21.27 (6.32)	21.82 (7.02)	16.13 (9.80)
Inflorescence
Number racemes per stem	1.10 (0.41)	2.32 (1.70)	2.00 (1.28)	2.52 (1.89)	1.50 (1.00)
Length of raceme (mm)	40.29 (15.08)	78.15 (33.39)	69.96 (33.34)	83.40 (34.80)	56.98 (26.23)
Leaf
Leaf length (mm)	16.95 (3.39)	35.27 (9.67)	32.82 (9.08)	36.50 (9.83)	33.39 (17.19)
Leaf width (mm)	2.35 (0.56)	2.63 (0.77)	2.55 (0.79)	2.68 (0.79)	2.43 (0.49)
Bract
Bract length (mm)	13.33 (2.41)	20.40 (4.47)	19.22 (3.74)	20.75 (4.69)	22.68 (5.39)
Bract width (mm)	3.75 (0.74)	4.41 (0.93)	4.70 (1.03)	4.27 (0.90)	4.55 (0.83)
Number secondary lobe pairs	1.21 (0.41)	2.11 (0.71)	2.52 (0.73)	1.98 (0.70)	1.50 (0.58)
Point of lobe attachment (mm)	6.40 (1.29)	8.97 (2.03)	8.47 (1.78)	9.21 (2.16)	8.77 (1.93)
Calyx
Calyx length (mm)	14.47 (1.77)	14.29 (3.79)	11.14 (2.16)	15.36 (3.36)	18.60 (4.23)
Tip of calyx to sinus 1*	6.09 (1.00)	6.67 (2.20)	4.65 (1.56)	7.38 (1.77)	9.18 (2.27)
Tip of calyx to sinus 2*	5.79 (1.00)	6.02 (1.95)	4.29 (1.45)	6.65 (1.62)	7.88 (1.88)
Calyx lobe subequality (mm)	0.42 (0.27)	0.98 (0.57)	0.81 (0.47)	1.02 (0.61)	1.49 (0.44)
Corolla
Total corolla length (mm)	15.27 (1.97)	17.20 (2.81)	16.28 (2.28)	17.46 (3.02)	19.14 (3.06)
Teeth to bottom of corolla (mm)*	13.76 (1.92)	16.15 (2.95)	14.97 (2.27)	16.46 (3.05)	18.88 (3.26)
Sinus of beak and lower lip to bottom of corolla (mm)*	11.41 (1.69)	12.96 (2.36)	12.15 (1.99)	13.16 (2.47)	14.98 (2.48)
Tube length (mm)*	6.88 (1.44)	8.20 (1.69)	7.94 (1.57)	8.24 (1.87)	9.12 (1.15)
Teeth length (mm)*	1.48 (0.36)	1.81 (0.45)	1.64 (0.38)	1.86 (0.43)	2.28 (0.71)
Length of beak (mm)*	3.86 (0.53)	4.24 (0.69)	4.10 (0.52)	4.31 (0.78)	4.17 (0.81)
Lower lip length (mm)	5.40 (1.19)	6.14 (1.36)	5.39 (0.93)	6.36 (1.34)	7.48 (1.77)
Beak to tube ratio	4.01 (0.46)	4.11 (0.52)	4.01 (0.49)	4.11 (0.53)	4.64 (0.50)
