# Supplementary material for: Quantifying morphological variation in the Castilleja pilosa species complex (Orobanchaceae)
Source: PeerJ. 2019 Jun 20;7:e7090. doi: 10.7717/peerj.7090 (PMC6589334; doi:10.7717/peerj.7090)
Supplement: Supplemental Information 6 [file peerj-07-7090-s006.xlsx]

## Sheet: supplemental.table.S3
Species		C. nana	C. pilosa (all varieties)	C. pilosa var. pilosa	C. pilosa var. longispica	C. pilosa var. steenensis
Habit
Decumbent base:	both	5	2	1	0	1
	no	8	70	45	22	3
	yes	16	7	6	1	0
Surface textures
Recurved hair:	absent	22	48	36	12	0
	present	7	31	16	11	4
Glandular hair:	absent	6	50	36	10	4
	present	23	29	16	13	0
Leaf
Leaf lobing:	absent	3	0	0	0	0
	present	26	79	52	23	4
Calyx
Calyx lobe shape:	deltoid	0	2	0	2	0
	deltoid/lanceolate	0	3	1	2	0
	lanceolate	21	54	39	15	0
	lanceolate/linear	4	13	8	3	2
	linear	4	7	4	1	2
Corolla
Lower lip pouchy:	absent	0	0	0	0	0
	present	29	79	52	23	4
Teeth petaloid:	absent	0	0	0	0	0
	present	29	79	52	23	4
Stigmas exserted:	absent	0	0	0	0	0
	present	29	79	52	23	4
