# Supplementary material for: Quantifying morphological variation in the Castilleja pilosa species complex (Orobanchaceae)
Source: PeerJ. 2019 Jun 20;7:e7090. doi: 10.7717/peerj.7090 (PMC6589334; doi:10.7717/peerj.7090)
Supplement: Supplemental Information 7 — For each collection, for each analysis, the cluster assignment and silhouette coefficient are reported. Additionally, for each cluster in each analysis, a membership coefficient is reported for each individual. Finally, the taxonomic identification of each individual is provided. [file peerj-07-7090-s007.xlsx]

## Sheet: supplemental.table.S4
				k=4 Clusters							k=3 Clusters						k=2 Clusters
						membership coefficients							membership coefficients					membership coefficients
	Collector/Collection number	Taxon ID		Cluster assignment	Silhouette width	Cluster 1	Cluster 2	Cluster 3	Cluster 4		Cluster assignment	Silhouette width	Cluster 1	Cluster 2	Cluster 3		Cluster assignment	Silhouette width	Cluster 1	Cluster 2
1	Atwood 20851	nana		1	0.2523	0.86	0.02	0.1	0.02		1	0.2429	0.88	0.02	0.1		1	0.4081	0.95	0.05
2	Bafus 222	pilosa		2	0.3878	0.01	0.88	0.03	0.08		2	0.2825	0.03	0.86	0.11		2	0.3369	0.07	0.93
3	Bradley 156	pilosa		2	0.3336	0.05	0.74	0.06	0.14		2	0.2734	0.11	0.74	0.16		2	0.2593	0.18	0.82
4	Brainerd 1402	pilosa		3	0.0551	0.34	0.07	0.39	0.2		3	0.047	0.43	0.11	0.46		1	0.2375	0.79	0.21
5	Brunsfeld 1525	longispica		3	0.3348	0.08	0.08	0.76	0.09		3	0.3449	0.12	0.1	0.78		1	0.1481	0.68	0.32
6	Brunsfeld 1626	longispica		4	-0.0371	0.06	0.33	0.26	0.34		2	0.0022	0.09	0.5	0.41		2	0.1687	0.25	0.75
7	Chisaki 895	pilosa		3	0.2603	0.11	0.12	0.68	0.1		3	0.2993	0.16	0.14	0.71		1	0.1368	0.67	0.33
8	Cholewa 7244	longispica		3	0.0675	0.38	0.08	0.46	0.08		1	-0.0297	0.48	0.08	0.44		1	0.2916	0.87	0.13
9	Colwell JM213B	pilosa		3	0.3091	0.09	0.04	0.84	0.04		3	0.268	0.16	0.05	0.79		1	0.2701	0.88	0.12
10	Cronquist 11001	nana		1	0.3162	0.87	0.03	0.07	0.03		1	0.275	0.88	0.03	0.08		1	0.3257	0.91	0.09
11	Cronquist 1214	longispica		4	0.0705	0.07	0.14	0.26	0.53		3	0.031	0.13	0.35	0.52		2	0.0983	0.35	0.65
12	Cronquist 1593	longispica		2	0.2093	0.03	0.58	0.08	0.31		2	0.2346	0.05	0.78	0.17		2	0.3108	0.11	0.89
13	Cronquist 2556	longispica		4	0.2019	0.13	0.16	0.15	0.56		2	0.0996	0.25	0.43	0.32		2	0.1129	0.37	0.63
14	Cronquist 7067	pilosa		4	0.1323	0.1	0.19	0.18	0.53		2	0.0764	0.18	0.43	0.38		2	0.1059	0.34	0.66
15	Cronquist 7817	pilosa		2	0.0928	0.01	0.55	0.04	0.4		2	0.3671	0.02	0.91	0.07		2	0.4344	0.04	0.96
16	Cronquist 8218	pilosa		2	0.2206	0.03	0.6	0.11	0.25		2	0.2021	0.06	0.71	0.23		2	0.3038	0.13	0.87
17	Davis 148 32	longispica		3	0.2294	0.05	0.06	0.73	0.16		3	0.3201	0.07	0.1	0.83		1	0.0661	0.57	0.43
18	Davis 216	longispica		4	0.2239	0.04	0.16	0.09	0.72		2	0.1957	0.1	0.62	0.28		2	0.2658	0.18	0.82
19	Davis 556	longispica		3	0.3071	0.05	0.06	0.84	0.05		3	0.3543	0.08	0.08	0.84		1	0.1396	0.69	0.31
20	Denton ALD 01	pilosa		4	-0.0373	0.02	0.41	0.05	0.52		2	0.3222	0.03	0.86	0.1		2	0.3634	0.07	0.93
21	Denton 3886	pilosa		2	0.0584	0.26	0.37	0.13	0.25		1	0.0467	0.41	0.38	0.21		2	0.0481	0.46	0.54
22	Egger 1225	pilosa		2	0.2052	0.06	0.51	0.17	0.26		2	0.1429	0.12	0.57	0.31		2	0.2133	0.24	0.76
23	Egger 1232	pilosa		4	-0.0039	0.02	0.4	0.07	0.52		2	0.2765	0.03	0.84	0.14		2	0.3754	0.06	0.94
24	Egger 1495	pilosa		3	0.2079	0.08	0.15	0.65	0.12		3	0.2591	0.12	0.17	0.71		1	0.0537	0.56	0.44
25	Egger 754	longispica		2	0.2232	0.08	0.53	0.19	0.2		2	0.0959	0.13	0.53	0.33		2	0.156	0.28	0.72
26	Egger 755	longispica		4	0.1604	0.01	0.14	0.03	0.82		2	0.3113	0.02	0.86	0.12		2	0.4014	0.05	0.95
27	Egger 959a	pilosa		4	0.036	0.04	0.36	0.08	0.52		2	0.2919	0.07	0.76	0.17		2	0.3425	0.12	0.88
28	Egger 969a	pilosa		2	0.3562	0.02	0.8	0.05	0.13		2	0.2846	0.04	0.83	0.13		2	0.3405	0.1	0.9
29	Egger 969b	pilosa		4	0.039	0.03	0.34	0.08	0.54		2	0.2859	0.06	0.76	0.17		2	0.3401	0.12	0.88
30	Egger 980d	longispica		3	0.3231	0.07	0.09	0.77	0.07		3	0.3633	0.1	0.11	0.79		1	0.1299	0.65	0.35
31	Egger 984a	longispica		3	0.2032	0.05	0.11	0.62	0.22		3	0.2749	0.07	0.18	0.75		2	0.0041	0.43	0.57
32	Ertter 5728	pilosa		2	0.3603	0.02	0.83	0.06	0.1		2	0.2308	0.04	0.79	0.17		2	0.3106	0.1	0.9
33	Ertter 8808	longispica		2	0.2922	0.06	0.64	0.1	0.21		2	0.2334	0.11	0.68	0.21		2	0.2565	0.2	0.8
34	Ferris 11084	nana		1	0.0865	0.46	0.08	0.29	0.17		1	0.1077	0.56	0.12	0.32		1	0.2329	0.79	0.21
35	Fox 689	longispica		3	0.1382	0.24	0.09	0.45	0.22		3	0.0692	0.33	0.13	0.54		1	0.1869	0.75	0.25
36	Gentry 2138	nana		3	0.0754	0.39	0.06	0.48	0.07		1	-0.0222	0.49	0.06	0.45		1	0.3084	0.9	0.1
37	Gilman 2015 036	nana		1	0.2746	0.86	0.02	0.1	0.02		1	0.2776	0.88	0.02	0.1		1	0.3833	0.94	0.06
38	Gilman 2015 038	nana		1	0.1592	0.76	0.03	0.18	0.03		1	0.1635	0.8	0.03	0.17		1	0.3916	0.94	0.06
39	Gross 717	pilosa		2	0.058	0.04	0.39	0.36	0.22		3	0.0293	0.06	0.41	0.53		2	0.1614	0.22	0.78
40	Halse 1831	pilosa		3	0.2746	0.06	0.08	0.81	0.05		3	0.335	0.11	0.09	0.8		1	0.1488	0.72	0.28
41	Hitchcock 5613	nana		1	0.3708	0.96	0.01	0.03	0.01		1	0.3424	0.95	0.01	0.04		1	0.4357	0.97	0.03
42	Hitchcock s.n.	pilosa		2	0.3767	0.01	0.87	0.04	0.09		2	0.2675	0.02	0.87	0.11		2	0.3842	0.05	0.95
43	Holmgren 10760	nana		1	0.0662	0.62	0.04	0.28	0.06		1	0.1409	0.7	0.05	0.25		1	0.3483	0.92	0.08
44	Holmgren 1233	pilosa		4	0.0747	0.03	0.21	0.13	0.63		2	0.1344	0.06	0.63	0.3		2	0.2475	0.15	0.85
45	Holmgren 1447	nana		1	0.2712	0.83	0.02	0.1	0.05		1	0.2436	0.86	0.03	0.11		1	0.3457	0.92	0.08
46	Holmgren 1569	nana		1	0.4131	0.96	0.01	0.03	0.01		1	0.3744	0.95	0.01	0.04		1	0.4343	0.96	0.04
47	Holmgren 1652	nana		1	0.3178	0.91	0.01	0.06	0.01		1	0.2849	0.91	0.02	0.07		1	0.399	0.95	0.05
48	Holmgren 2220	nana		1	0.4105	0.97	0	0.02	0.01		1	0.3712	0.96	0.01	0.03		1	0.4436	0.96	0.04
49	Holmgren 2235	nana		1	0.0546	0.64	0.04	0.27	0.05		1	0.0577	0.7	0.04	0.26		1	0.3722	0.92	0.08
50	Holmgren 2812	nana		1	0.2059	0.53	0.16	0.08	0.24		1	0.1939	0.66	0.22	0.12		1	0.0084	0.58	0.42
51	Holmgren 2847	nana		1	0.281	0.86	0.02	0.1	0.02		1	0.2541	0.87	0.03	0.11		1	0.3897	0.93	0.07
52	Holmgren 2879	steenensis		4	0.1165	0.21	0.12	0.18	0.49		1	0.0819	0.38	0.27	0.34		1	0.0061	0.54	0.46
53	Holmgren 2913	nana		1	0.1967	0.59	0.19	0.1	0.13		1	0.2484	0.69	0.18	0.13		1	0.0841	0.65	0.35
54	Holmgren 2918	nana		4	0.051	0.13	0.3	0.12	0.44		2	0.1243	0.23	0.54	0.23		2	0.1619	0.31	0.69
55	Holmgren 2924	nana		1	0.1991	0.74	0.03	0.16	0.07		1	0.1762	0.78	0.04	0.17		1	0.3406	0.91	0.09
56	Holmgren 2926	pilosa		2	0.2941	0.1	0.62	0.11	0.18		2	0.1713	0.19	0.59	0.22		2	0.1747	0.28	0.72
57	Holmgren 2936	nana		1	0.0431	0.52	0.08	0.33	0.07		1	0.0761	0.6	0.08	0.32		1	0.2947	0.87	0.13
58	Holmgren 3619	pilosa		3	0.2052	0.05	0.07	0.7	0.18		3	0.2908	0.07	0.11	0.81		1	0.057	0.56	0.44
59	Holmgren 3625	nana		1	0.2537	0.74	0.07	0.12	0.06		1	0.2598	0.79	0.07	0.14		1	0.2651	0.84	0.16
60	Holmgren 4119	pilosa		3	0.1574	0.3	0.08	0.55	0.08		3	0.1724	0.38	0.09	0.53		1	0.2746	0.83	0.17
61	Holmgren 5347	longispica		3	0.3366	0.08	0.07	0.78	0.07		3	0.3275	0.13	0.09	0.79		1	0.18	0.73	0.27
62	Holmgren 8861	pilosa		2	0.0374	0.05	0.44	0.08	0.43		2	0.273	0.09	0.76	0.16		2	0.3033	0.14	0.86
63	Holmgren 9484	pilosa		2	0.3359	0.01	0.81	0.06	0.12		2	0.2224	0.03	0.81	0.16		2	0.3279	0.08	0.92
64	Holmgren 9618	pilosa		2	0.3916	0.01	0.84	0.04	0.1		2	0.281	0.04	0.84	0.12		2	0.3468	0.09	0.91
65	Ionta 00 14	pilosa		4	0.2696	0.03	0.12	0.08	0.77		2	0.1853	0.08	0.62	0.29		2	0.2783	0.16	0.84
66	Jacobs 2015 072	pilosa		4	-0.0664	0.18	0.29	0.14	0.39		2	0.0171	0.31	0.43	0.26		2	0.1007	0.4	0.6
67	Jacobs 2015 073	pilosa		1	0.1047	0.39	0.2	0.13	0.28		1	0.1521	0.54	0.26	0.2		1	-0.0014	0.57	0.43
68	Jacobs 2015 075	pilosa		4	-0.0341	0.06	0.3	0.18	0.46		2	0.1017	0.11	0.52	0.36		2	0.2015	0.24	0.76
69	Jacobs 2015 076	nana		3	0.1961	0.13	0.07	0.61	0.19		3	0.2094	0.19	0.11	0.71		1	0.1556	0.74	0.26
70	Jacobs 2015 084	pilosa		3	0.289	0.11	0.06	0.77	0.05		3	0.2582	0.18	0.07	0.75		1	0.2313	0.82	0.18
71	Jacobs 2015 093	nana		1	0.2379	0.82	0.02	0.12	0.03		1	0.2835	0.85	0.03	0.12		1	0.3933	0.94	0.06
72	Jacobs 2015 096	nana		1	0.2052	0.59	0.11	0.17	0.12		1	0.2232	0.68	0.12	0.2		1	0.1855	0.78	0.22
73	Jacobs 2015 102	nana		1	0.3197	0.76	0.07	0.1	0.07		1	0.3257	0.82	0.07	0.11		1	0.2259	0.84	0.16
74	Jacobs 2015 106	steenensis		4	0.0361	0.27	0.12	0.18	0.42		1	0.1209	0.44	0.25	0.31		1	0.0408	0.59	0.41
75	Johnson 850289	longispica		4	-0.0405	0.02	0.44	0.06	0.48		2	0.2925	0.03	0.85	0.13		2	0.3729	0.06	0.94
76	Jones 295	longispica		3	0.302	0.1	0.04	0.82	0.04		3	0.2616	0.18	0.06	0.77		1	0.2616	0.87	0.13
77	Kemper 143	longispica		3	0.0941	0.17	0.22	0.49	0.12		3	0.1512	0.24	0.2	0.57		1	0.099	0.65	0.35
78	Knoke 472	pilosa		2	0.3914	0.01	0.88	0.03	0.08		2	0.2863	0.04	0.85	0.11		2	0.3167	0.08	0.92
79	Knoke 577	pilosa		2	0.3971	0.01	0.9	0.03	0.07		2	0.2792	0.02	0.88	0.1		2	0.3721	0.05	0.95
80	Knoke 611	pilosa		3	0.3191	0.05	0.08	0.8	0.07		3	0.3704	0.08	0.1	0.82		1	0.1221	0.64	0.36
81	Kruckeburg 4167	longispica		2	0.3582	0.01	0.84	0.05	0.11		2	0.2626	0.02	0.85	0.13		2	0.385	0.06	0.94
82	Maguire 21128	nana		1	0.2961	0.82	0.05	0.09	0.04		1	0.2616	0.85	0.05	0.1		1	0.2873	0.88	0.12
83	Maguire 25800	nana		1	0.2244	0.83	0.02	0.12	0.02		1	0.2446	0.86	0.02	0.12		1	0.3855	0.95	0.05
84	Maguire 26487	pilosa		4	0.0736	0.03	0.27	0.18	0.53		2	0.0908	0.05	0.61	0.35		2	0.289	0.12	0.88
85	Moseley 591	longispica		3	0.1323	0.13	0.22	0.53	0.12		3	0.1996	0.19	0.2	0.61		1	0.073	0.6	0.4
86	Olmstead 717	pilosa		4	0.215	0.02	0.15	0.06	0.76		2	0.2378	0.06	0.72	0.22		2	0.3145	0.12	0.88
87	Olmstead 752	pilosa		3	0.2114	0.22	0.09	0.62	0.07		3	0.2378	0.3	0.1	0.6		1	0.2395	0.81	0.19
88	Olmstead RGO96 54	pilosa		2	0.3658	0.01	0.85	0.04	0.1		2	0.2623	0.02	0.85	0.12		2	0.3797	0.06	0.94
89	Ownbey 3412	longispica		4	0.1446	0.06	0.19	0.07	0.68		2	0.2455	0.14	0.67	0.19		2	0.2483	0.2	0.8
90	Packard 78 89	pilosa		2	0.36	0.01	0.79	0.06	0.13		2	0.2572	0.03	0.82	0.15		2	0.3845	0.07	0.93
91	Peck 18941	pilosa		4	0.1647	0.02	0.18	0.06	0.74		2	0.2604	0.06	0.77	0.18		2	0.3307	0.11	0.89
92	Peck 21406	pilosa		4	0.1475	0.01	0.19	0.05	0.75		2	0.28	0.03	0.82	0.15		2	0.4044	0.06	0.94
93	Pennell 22950	nana		1	0.3725	0.94	0.01	0.04	0.01		1	0.3828	0.94	0.01	0.05		1	0.4275	0.96	0.04
94	Reveal 2428	steenensis		4	0.1562	0.02	0.2	0.06	0.72		2	0.2757	0.04	0.77	0.19		2	0.3733	0.09	0.91
95	Reveal 2450	pilosa		2	0.3508	0.01	0.8	0.06	0.13		2	0.2404	0.03	0.81	0.16		2	0.3536	0.08	0.92
96	Rodman 681	pilosa		4	0.0099	0.02	0.39	0.08	0.52		2	0.2555	0.03	0.81	0.16		2	0.3717	0.07	0.93
97	Rogers 1006	pilosa		2	0.2232	0.04	0.57	0.12	0.26		2	0.193	0.07	0.68	0.25		2	0.302	0.15	0.85
98	Tiehm 10589	pilosa		3	0.2657	0.16	0.08	0.69	0.07		3	0.2938	0.23	0.1	0.67		1	0.2238	0.79	0.21
99	Tiehm 13189	pilosa		3	0.2522	0.06	0.12	0.75	0.07		3	0.308	0.1	0.13	0.77		1	0.0905	0.61	0.39
100	Tiehm 13885	pilosa		3	0.3042	0.12	0.1	0.67	0.12		3	0.2738	0.17	0.12	0.71		1	0.1626	0.7	0.3
101	Tiehm 8790	pilosa		2	0.1117	0.11	0.38	0.17	0.34		2	0.1229	0.17	0.53	0.3		2	0.1594	0.29	0.71
102	Tiehm 9598	pilosa		3	0.3235	0.03	0.06	0.88	0.04		3	0.3787	0.05	0.07	0.88		1	0.0968	0.62	0.38
103	Train 4258	nana		3	0.0331	0.42	0.05	0.48	0.05		1	-0.0409	0.54	0.05	0.41		1	0.3161	0.93	0.07
104	Vollmer 229	nana		1	0.0941	0.44	0.11	0.1	0.35		1	0.1954	0.63	0.21	0.16		1	0.0367	0.61	0.39
105	Whitehead 487	longispica		4	0.1833	0.02	0.13	0.04	0.81		2	0.2759	0.06	0.78	0.17		2	0.3193	0.1	0.9
106	Wilson s.n.	pilosa		3	0.1412	0.28	0.15	0.47	0.1		3	0.1662	0.35	0.16	0.49		1	0.1819	0.75	0.25
107	Wolf 5217	pilosa		3	0.0214	0.27	0.2	0.31	0.21		3	0.0083	0.37	0.25	0.39		1	0.0698	0.62	0.38
108	Zika 11219	steenensis		4	0.2203	0.04	0.17	0.11	0.68		2	0.1635	0.09	0.6	0.32		2	0.2798	0.18	0.82
